# Supplementary material
Source: publisher figshare collection journal article supplement (https://acs.figshare.com/ndownloader/files/27796423)
Supplement: Supplementary file 1 [file 27796423]

# Supporting Information

## Polyelectrolyte Multilayers for Forward Osmosis, Combining the Right Multilayer and Draw Solution

*Authors names:*

*Dennis Maik Reurink, Wiebe M. de Vos, Hendrik D.W. Roesink, Joris de Grooth\**

Membrane Science & Technology, University of Twente, MESA+ Institute for Nanotechnology, P.O.

Box 217, 7500 AE Enschede, The Netherlands

\*Corresponding author: [j.degrooth@utwente.nl](mailto:j.degrooth@utwente.nl)

## SUPPLEMENTARY INFORMATION

### FO PERFORMANCE

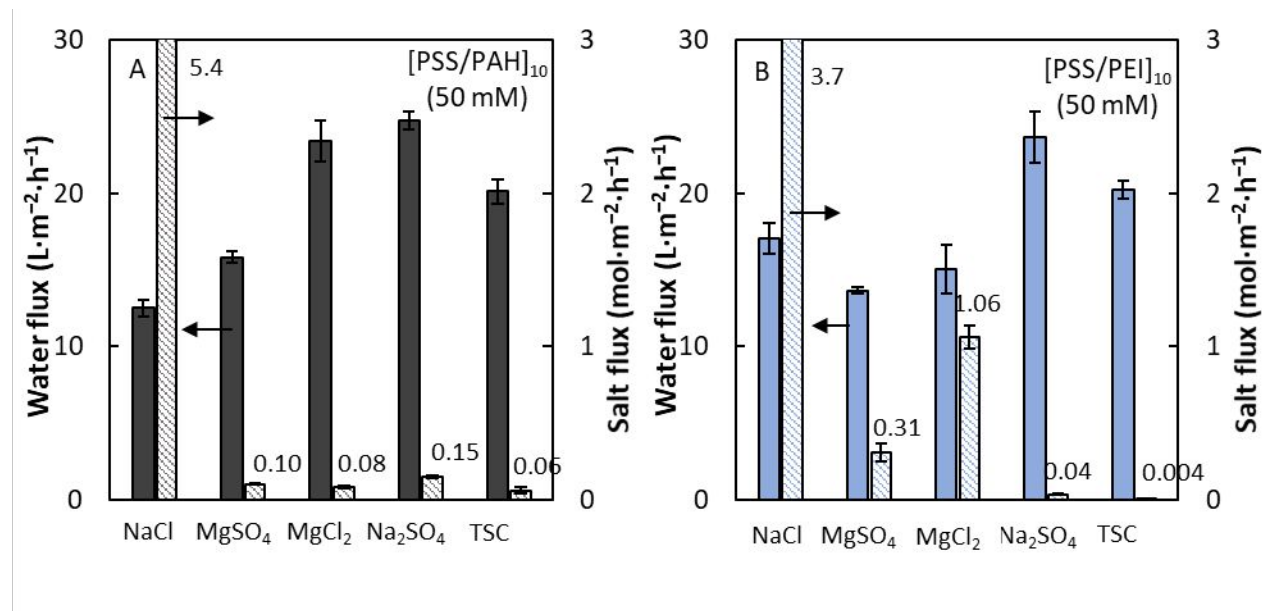

**Figure S1:** Water fluxes (solid bars on the left y-axis's) and molar salt fluxes (patterned bars on the right y-axis's) of various FO measurements at which a demineralized feed was used facing the active layer (FS-AL) and a draws solution with an osmotic pressure of 36 bar. PSS/PAH (A) and PSS/PEI (B) PEM membranes built at 50 mM tested for various draw solutions at equal osmotic pressures. Error bars are standard deviations of 5 different PEM membranes.

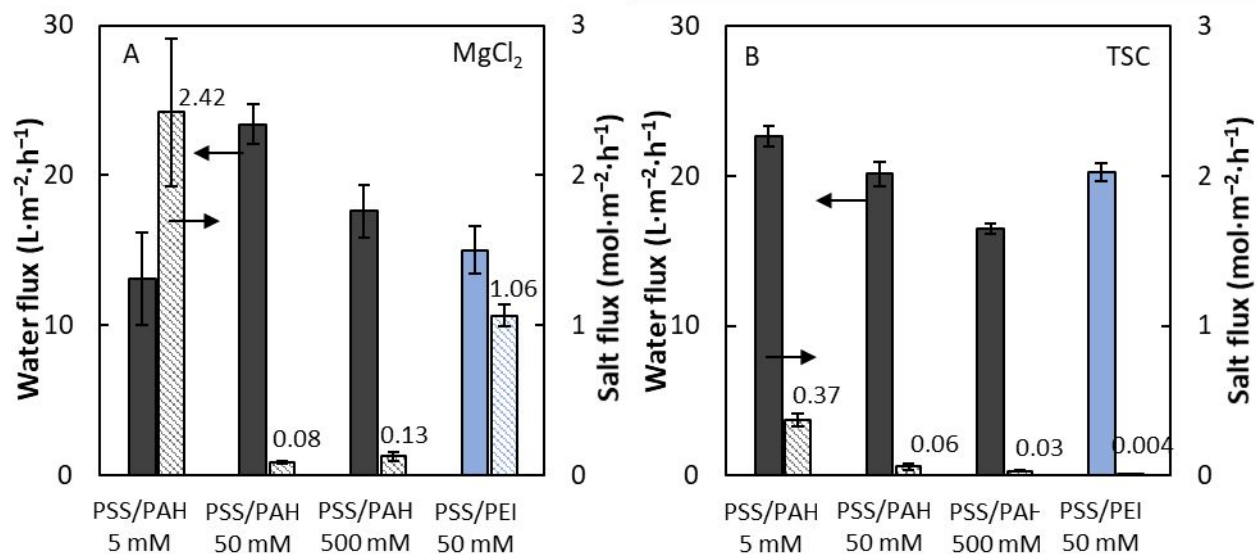

**Figure S2:** Water fluxes (solid bars on the left y-axis's) and molar salt fluxes (patterned bars on the right y-axis's) of various FO measurements at which a demineralized feed was used facing the active layer (FS-AL) and a draws solution with an osmotic pressure of 36 bar. Using MgCl<sub>2</sub> (A) as a draw solution and TSC (B) for PSS/PAH (built at 5, 50, and 500 mM, black columns) and PSS/PEI (built at 50 mM, blue columns). Error bars are standard deviations of 5 different PEM membranes.

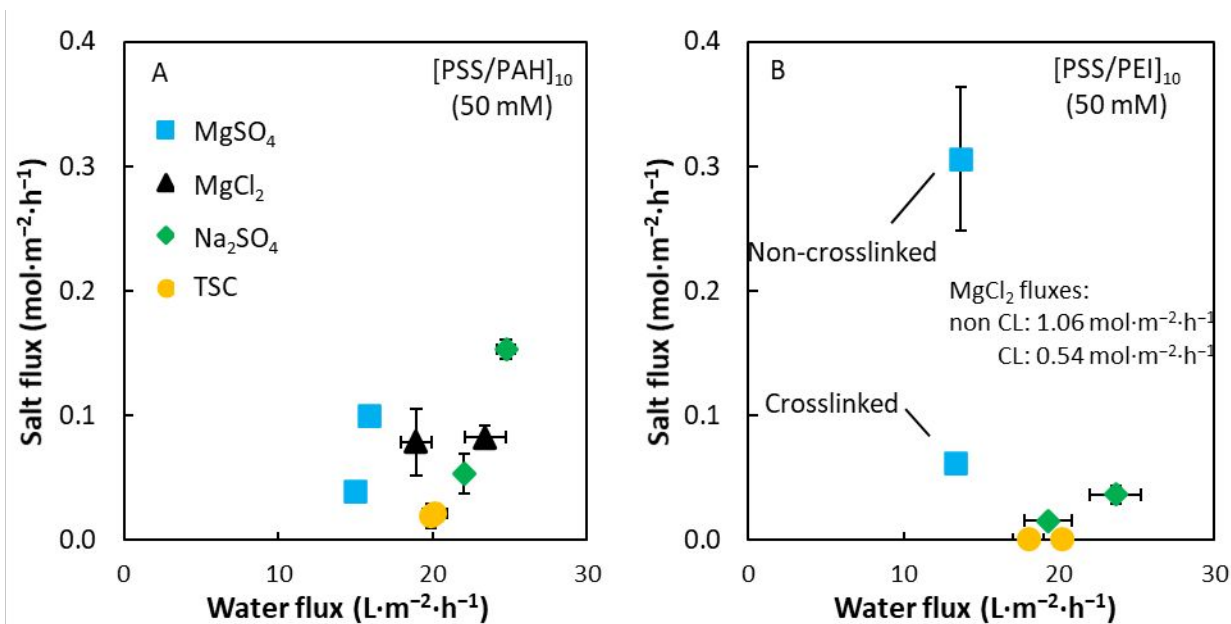

**Figure S3:** Molar salt flux as function of the water flux for PSS/PAH (A) and PSS/PEI (B) PEM membranes for a variety of draw solutions:  $\text{MgSO}_4$  blue and square symbols;  $\text{MgCl}_2$  black and triangle symbols;  $\text{Na}_2\text{SO}_4$  green and diamond symbols; and TSC yellow and circle symbols. The non-crosslinked (non-CL) PEM membranes have solid symbols and the crosslinked (CL) PEM membranes have open symbols. Error bars are standard deviation from 5 different membrane samples.
